# Supplementary material
Source: Royal Society of Chemistry journal article supplement (doi:10.1039/d6ta02364a)
Supplement: d6ta02364a1.pdf [file d6ta02364a1.pdf]

## Electronic Supplementary Information

# Interfacial Confinement of Ultra-Low Pt Single Atoms *via* Co-Pt-C/N Electronic Bridging for Efficient Hydrogen Evolution

Yunqi Song, Yumei Zhang, Yao Yao\*

(Ningxia Key Laboratory of Green Catalytic Materials and Technology, College of Chemistry and Chemical Engineering, Ningxia Normal University, Guyuan, 756000, PR China)

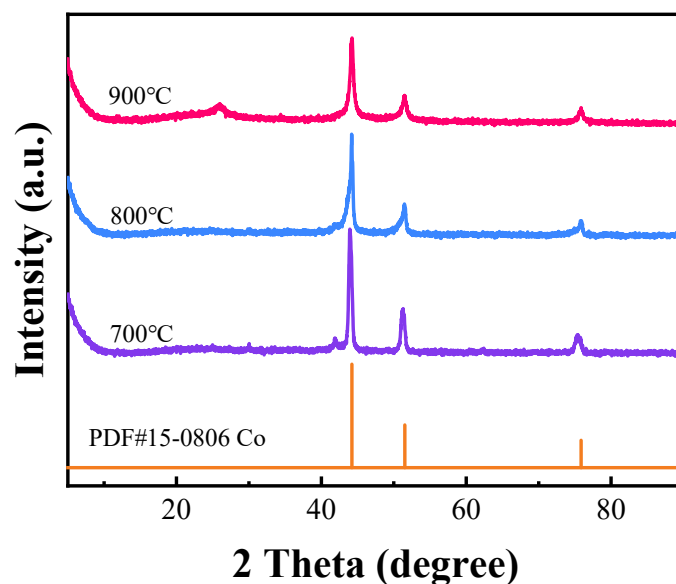

Fig.S1 XRD Patterns of Pt<sub>SA</sub>Co<sub>NP</sub>/CN pyrolysis at 700°C, 800°C, and 900°C, respectively.

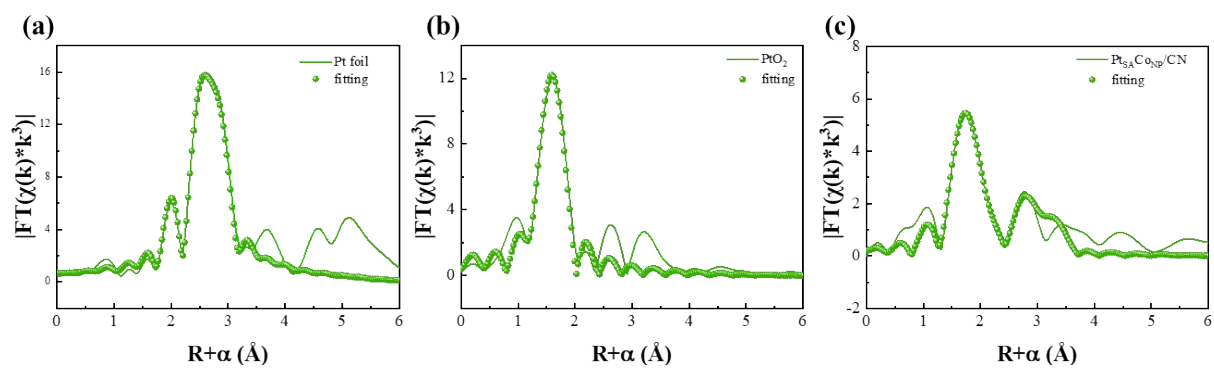

**Fig. S2** Fitting of the Fourier transform  $k^3$ -weighted EXAFS spectra for Pt foil,  $\text{PtO}_2$ , and  $\text{Pt}_{\text{SA}}\text{CoNP}/\text{CN}$ .

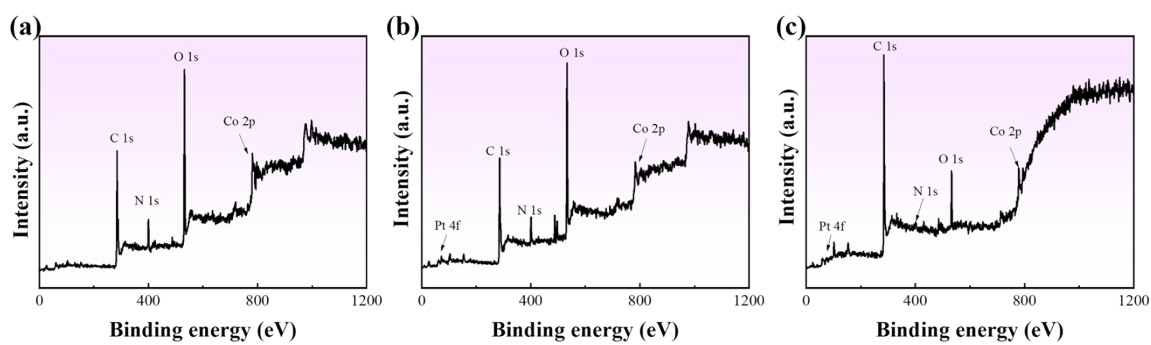

**Fig. S3** XPS survey spectra of  $\text{Co-NH}_2\text{BDC}$ ,  $\text{PtCo-NH}_2\text{BDC}$ , and  $\text{Pt}_{\text{SA}}\text{CoNP}/\text{CN}$ .

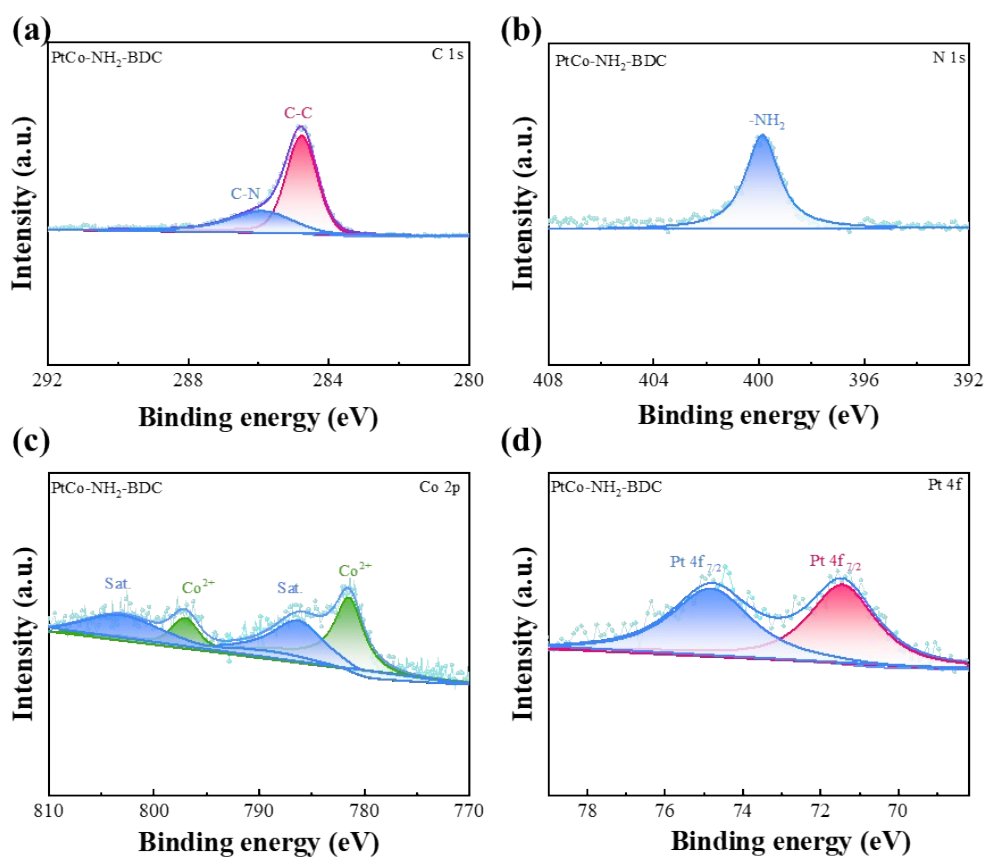

Fig. S4 C 1s, N 1s, Co 2p, and Pt 4f high-resolution XPS region of PtCo-NH<sub>2</sub>BDC.

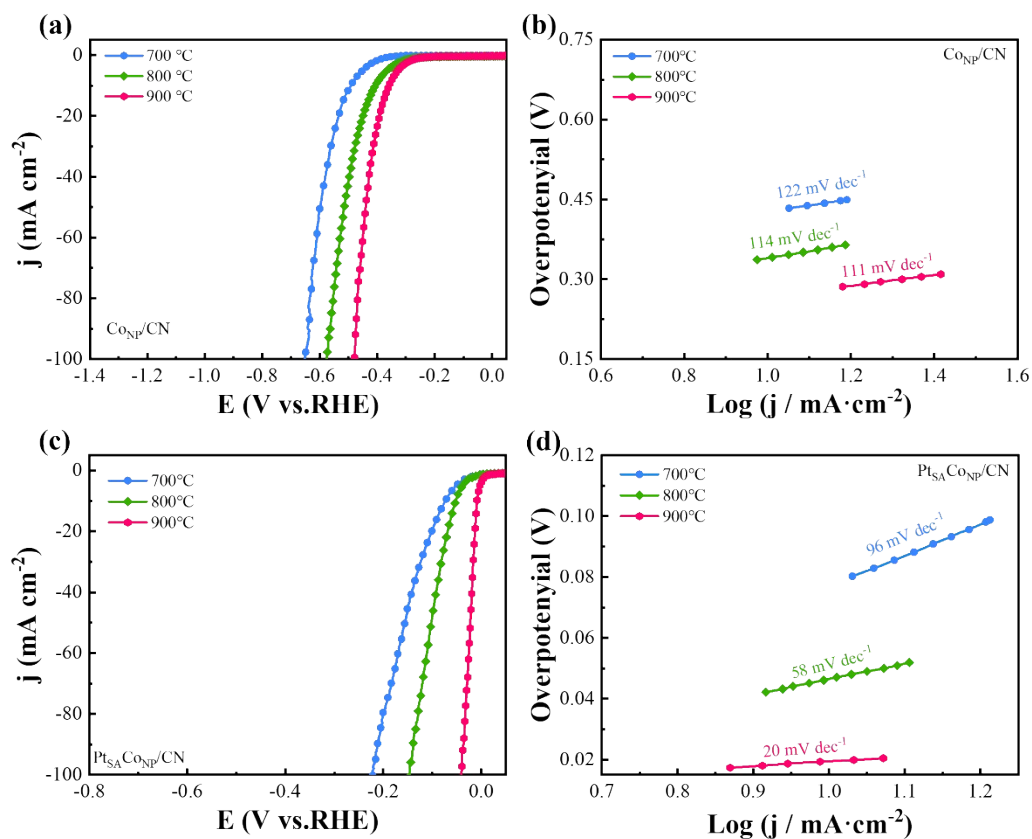

**Fig. S5** Comparative HER polarization curves and Tafel plots in 0.5 M H<sub>2</sub>SO<sub>4</sub> for (a, b) CoNP/CN and (c, d) Pt<sub>SA</sub>CoNP/CN catalysts pyrolyzed at different temperatures.

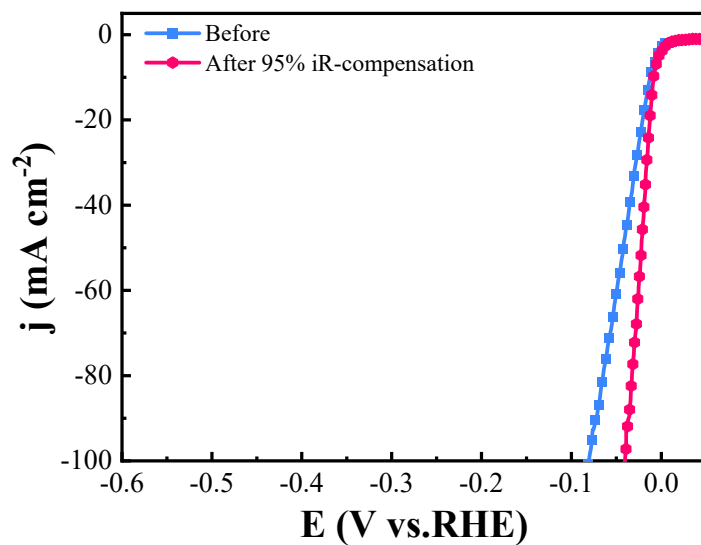

**Fig. S6** Polarization curves of Pt<sub>SA</sub>CoNP/CN (900 °C) in acidic conditions before and after iR compensation.

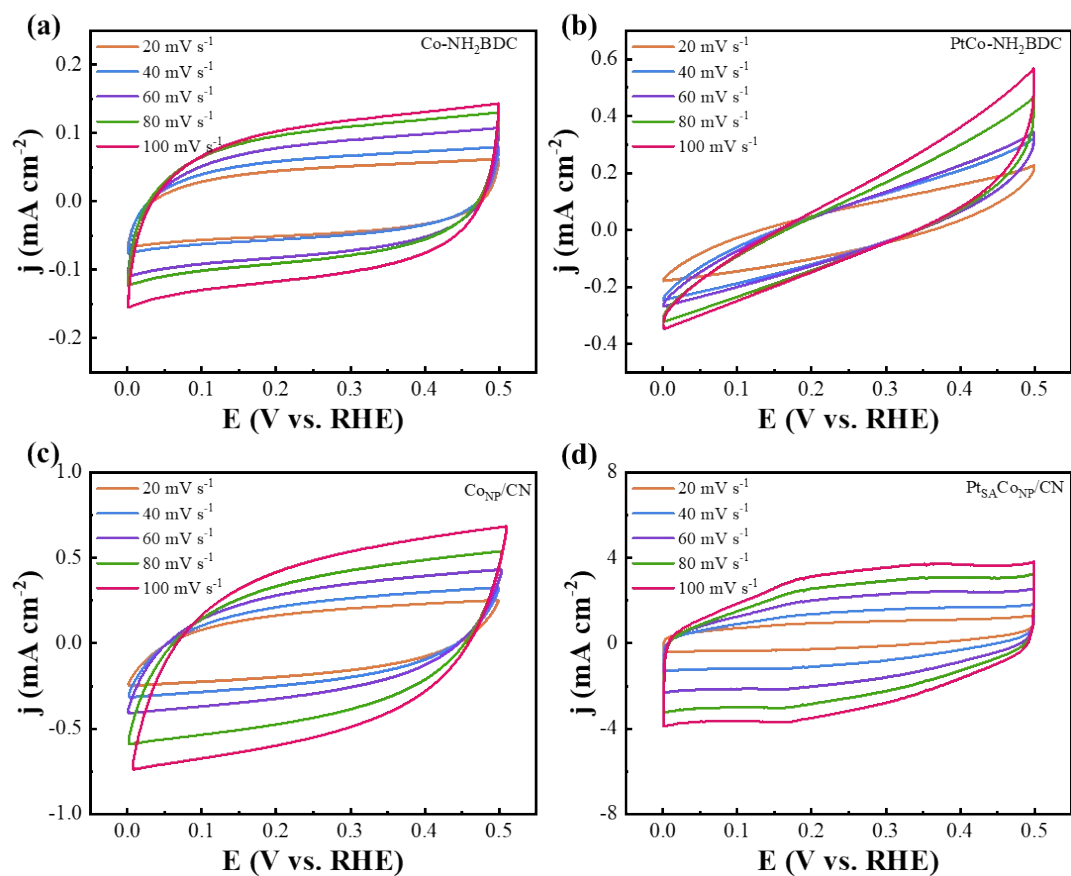

**Fig. S7** Cyclic voltammetry (CV) curves of (a)  $\text{Co-NH}_2\text{BDC}$ , (b)  $\text{PtCo-NH}_2\text{BDC}$ , (c)  $\text{Co}_{\text{NP}}/\text{CN}$  and (d)  $\text{Pt}_{\text{SA}}\text{Co}_{\text{NP}}/\text{CN}$  in  $0.5 \text{ M H}_2\text{SO}_4$ .

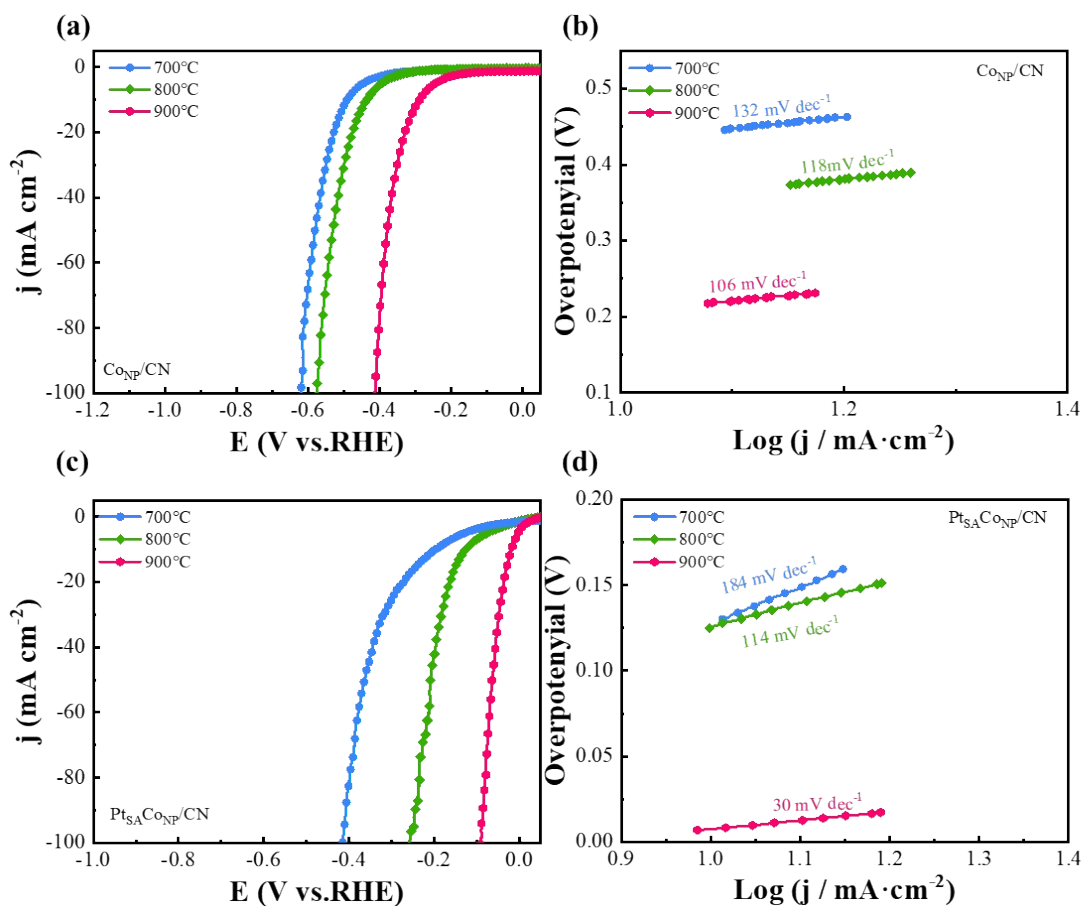

**Fig. S8** Comparative HER polarization curves and Tafel plots in 1.0 M KOH for (a, b)  $\text{Co}_{\text{NP}}/\text{CN}$  and (c, d)  $\text{Pt}_{\text{SA}}\text{Co}_{\text{NP}}/\text{CN}$  catalysts pyrolyzed at different temperatures.

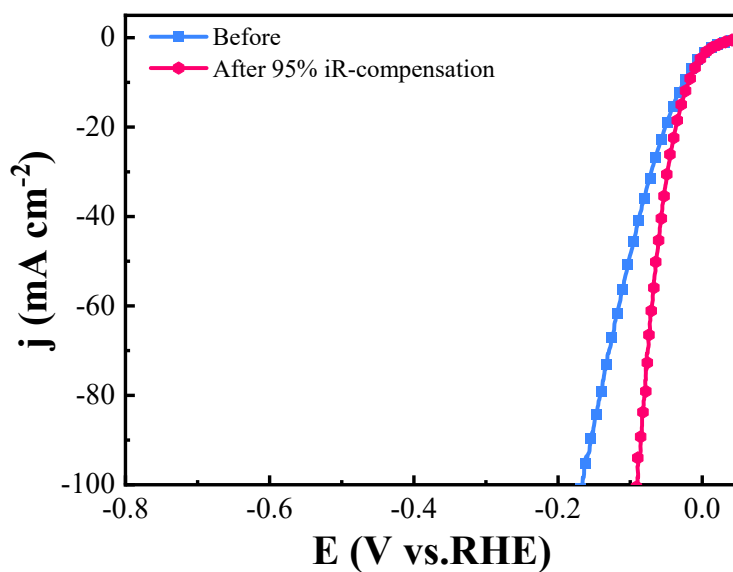

**Fig. S9** Polarization curves of  $\text{Pt}_{\text{SA}}\text{Co}_{\text{NP}}/\text{CN}$  in alkaline conditions before and after iR compensation.

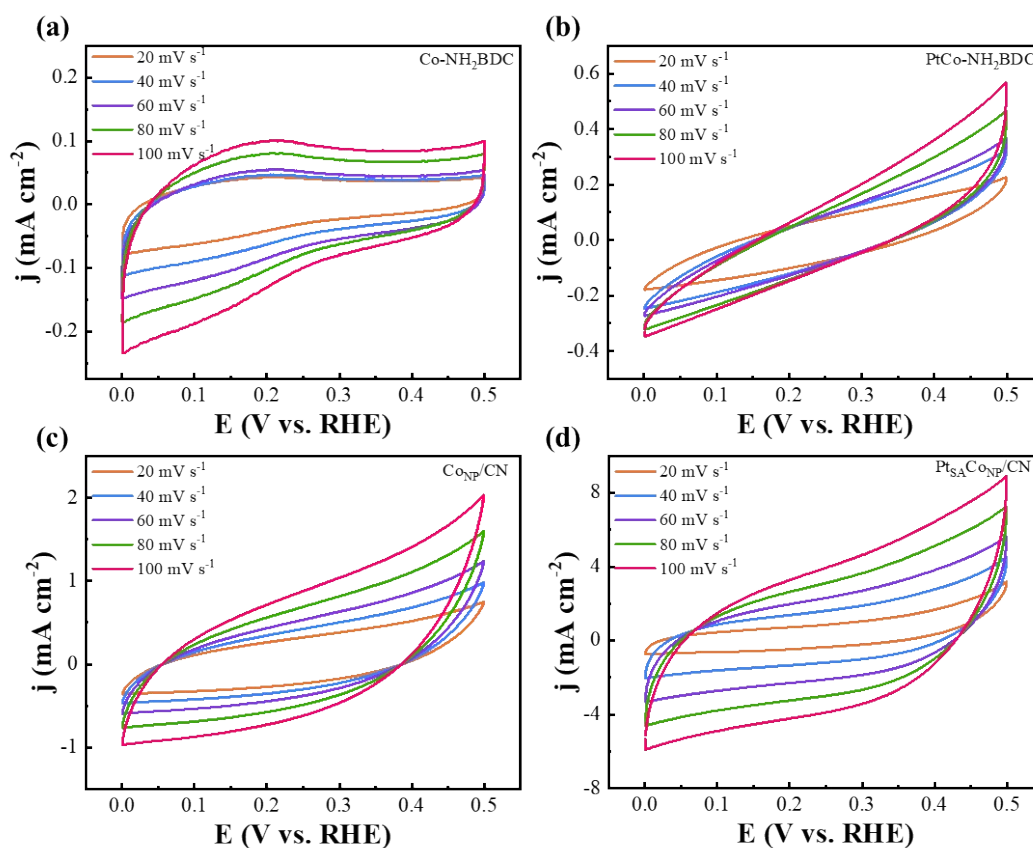

**Fig. S10** Cyclic voltammetry (CV) curves of (a) Co-NH<sub>2</sub>BDC, (b) PtCo-NH<sub>2</sub>BDC, (c) Co<sub>NP</sub>/CN and (d) Pt<sub>SA</sub>Co<sub>NP</sub>/CN in 1 M KOH.

**Table S1.** HER parameter of the catalysts under acidic conditions.

| Electrocatalyst                              | $\eta_{10}$ /mV | Tafel/mV dec <sup>-1</sup> | $C_{dl}$ /mF cm <sup>-2</sup> | $R_{ct}$ /ohm |
|----------------------------------------------|-----------------|----------------------------|-------------------------------|---------------|
|                                              |                 | 1                          |                               |               |
| Co-NH <sub>2</sub> BDC                       | 662             | 119                        | 0.79                          | 906           |
| Co <sub>NP</sub> /CN(700°C)                  | 493             | 122                        | /                             | /             |
| Co <sub>NP</sub> /CN(800°C)                  | 409             | 114                        | /                             | /             |
| Co <sub>NP</sub> /CN(900°C)                  | 363             | 111                        | 4.24                          | 138           |
| PtCo-NH <sub>2</sub> BDC                     | 290             | 200                        | 0.83                          | 441           |
| Pt <sub>SA</sub> Co <sub>NP</sub> /CN(700°C) | 77              | 96                         | /                             | /             |
| Pt <sub>SA</sub> Co <sub>NP</sub> /CN(800°C) | 51              | 58                         | /                             | /             |

|                                              |   |    |       |    |
|----------------------------------------------|---|----|-------|----|
| Pt <sub>SA</sub> Co <sub>NP</sub> /CN(900°C) | 8 | 20 | 30.77 | 54 |
|----------------------------------------------|---|----|-------|----|

**Table S2.** HER parameters of the catalysts under alkaline conditions.

| Electrocatalyst                              | $\eta_{10}/\text{mV}$ | Tafel/ $\text{mV dec}^{-1}$ | $C_{dl}/\text{mF cm}^{-2}$ | $R_{ct}/\text{ohm}$ |
|----------------------------------------------|-----------------------|-----------------------------|----------------------------|---------------------|
| Co-NH <sub>2</sub> BDC                       | 579                   | 141                         | 0.72                       | 585                 |
| Co <sub>NP</sub> /CN(700°C)                  | 494                   | 132                         | /                          | /                   |
| Co <sub>NP</sub> /CN(800°C)                  | 439                   | 118                         | /                          | /                   |
| Co <sub>NP</sub> /CN(900°C)                  | 287                   | 106                         | 6.01                       | 259                 |
| PtCo-NH <sub>2</sub> BDC                     | 416                   | 240                         | 0.82                       | 386                 |
| Pt <sub>SA</sub> Co <sub>NP</sub> /CN(700°C) | 208                   | 184                         | /                          | /                   |
| Pt <sub>SA</sub> Co <sub>NP</sub> /CN(800°C) | 124                   | 114                         | /                          | /                   |
| Pt <sub>SA</sub> Co <sub>NP</sub> /CN(900°C) | 18                    | 30                          | 41.20                      | 43                  |

**Table S3.** Comparison of the HER performance of advanced materials reported in the literature and in this work.

| Catalysts                                             | Acidic Overpotential ( $\eta$ )@j (mV @ mA cm <sup>-2</sup> ) | Acidic Tafel (mV dec <sup>-1</sup> ) | Alkaline Overpotential ( $\eta$ )@j (mV @ mA cm <sup>-2</sup> ) | Alkaline Tafel (mV dec <sup>-1</sup> ) | Ref.      |
|-------------------------------------------------------|---------------------------------------------------------------|--------------------------------------|-----------------------------------------------------------------|----------------------------------------|-----------|
| Pt <sub>SA</sub> Co <sub>NP</sub> /CN                 | 8@10                                                          | 20                                   | 18@10                                                           | 30                                     | This work |
| Pt <sub>SA</sub> /Co <sub>AC</sub> -O@ACTP            | 61@10                                                         | 43                                   | 77@10                                                           | 53                                     | 1         |
| Pt <sub>1</sub> Co <sub>6</sub> /np-Co <sub>2</sub> P | /                                                             | /                                    | 21@10                                                           | 31                                     | 2         |
| PtSe <sub>2</sub> /PtCo                               | 33@10                                                         | 22                                   | /                                                               | /                                      | 3         |
| CoPt <sub>3</sub> /a-FCWO-NS                          | /                                                             | /                                    | 135@10                                                          | 80.69                                  | 4         |
| CoPt@C                                                | /                                                             | /                                    | 15@10                                                           | 29                                     | 5         |
| CoPt-Pt <sub>SA</sub> /NDPCF                          | /                                                             | /                                    | 31@10                                                           | 43.6                                   | 6         |
| CNs@CoPt                                              | 4.2@10                                                        | 54.3                                 | 19.1@10                                                         | 88.7                                   | 7         |
| Co <sub>n</sub> -Pt <sub>1</sub> @NPC                 | /                                                             | /                                    | 20@10                                                           | 29.07                                  | 8         |

|                                       |   |   |       |    |    |
|---------------------------------------|---|---|-------|----|----|
| Pt <sub>sa</sub> -PtCo NCs/N-CNTs-900 | / | / | 47@10 | 41 | 9  |
| CoPt-Co <sub>SA</sub> @NSC            | / | / | 23@10 | 37 | 10 |

## References

- Zhang, J.; Wang, M.; Wan, T.; Shi, H.; Lv, A.; Xiao, W.; Jiao, S., Novel (Pt-O<sub>x</sub>)-(Co-O<sub>y</sub>) Nonbonding Active Structures on Defective Carbon from Oxygen-Rich Coal Tar Pitch for Efficient HER and ORR. *Adv. Mater.* **2022**, *34* (45).
- Jiang, K.; Liu, Z.; Wang, Z.; Xie, F.; Yuan, X.; Tan, Y., Manipulating Interfacial Water Via Metallic Pt<sub>1</sub>Co<sub>6</sub> Sites on Self-Adaptive Metal Phosphides to Enhance Water Electrolysis. *Adv. Mater.* **2025**, *37* (18).
- Hao, B.; Gan, M.; Guo, J.; Li, G.; Song, Y.; Shen, Y.; Xu, B.; Liu, P.; Guo, J., Constructing 2D PtSe<sub>2</sub>/PtCo Heterojunctions by Partial Selenization for Enhanced Hydrogen Evolution. *Adv. Funct. Mater.* **2024**, *35* (3).
- Wang, Z.; Li, S.; Zhang, G.; Yu, X.; Zhao, Z.; Zhang, Y.; Shi, Y.; Zhu, H.-B.; Xiao, X., Efficient electrocatalytic overall water splitting of porous 3D CoPt<sub>3</sub>/a-FCWO-NS heterostructures: Morphology modulation and interfacial engineering for the formation of crystalline-amorphous nanosheets. *Appl. Catal. B Environ* **2024**, *342*.
- Li, Z. Y.; Wang, D. L.; Zhang, C.; Wang, H. P.; Zhang, D. L.; Zhao, G. Q.; Lv, Z. G.; Sun, F. J., Core-shell CoPt@C assembled hierarchical catalysts via CH<sub>4</sub>-deposition strategy for efficient overall water splitting. *Rare Met.* **2025**, *44* (9), 6232-6245.
- Yang, W.; Cheng, P.; Li, Z.; Lin, Y.; Li, M.; Zi, J.; Shi, H.; Li, G.; Lian, Z.; Li, H., Tuning the Cobalt-Platinum Alloy Regulating Single-Atom Platinum for Highly Efficient Hydrogen Evolution Reaction. *Adv. Funct. Mater.* **2022**, *32* (39).
- Li, S.; Xie, W.; Song, Y.; Li, Y.; Song, Y.; Li, J.; Shao, M., Integrated CoPt electrocatalyst combined with upgrading anodic reaction to boost hydrogen evolution reaction. *Chem. Eng. J.* **2022**, *437*.
- Xu, Y.; Du, J.; Jiang, J.; Miao, Y.; Zhuang, Z.; Liu, Z.; Yan, Y.; Pan, R.; Yang, J.; Wang, M.; Gu, S.; Kang, L.; Wang, D., Co Nanoparticle: An Efficient H-pump for Pt Single Atoms Towards Enhanced Hydrogen Spillover. *Angew Chem Int Edit* **2025**, *64* (20).
- Chen, W.; Zhu, X.; Wei, W.; Chen, H.; Dong, T.; Wang, R.; Liu, M.; Ostrikov, K.; Peng, P.; Zang, S. Q., Neighboring Platinum Atomic Sites Activate Platinum-Cobalt Nanoclusters as High-Performance ORR/OER/HER Electrocatalysts. *Small* **2023**, *19* (47).
- Li, Y.; Liu, X.; Xue, S.; Liu, A.; Wen, S.; Chen, S., Boosting the Electrocatalytic Performance of CoPt Alloy with Enhanced Electron Transfer via Atomically Dispersed Cobalt Sites. *Small* **2023**, *19* (33).
